# Supplementary material for: Clinical study of double occlusal splints combined with manual reduction for the treatment of anterior disc displacement without reduction: a retrospective study
Source: Research Square preprint supplement (doi:10.21203/rs.3.rs-7081699/v1), 2025-09-30
Supplement: Supplementary file 1 [file 9e4d329a240bad159e608e7d.docx]

**List of Supplementary Materials**

Fig. S1 Fabrication process for the NARS

Fig. S2 Schematic representation of arthrocentesis

Fig. S3 Schematic diagram showing manual reduction

Table S1 Comparison between the observation groups and control groups in terms of disc re-displacement within one week

Table S2 Comparison of treatment efficacy between the observation groups and control groups


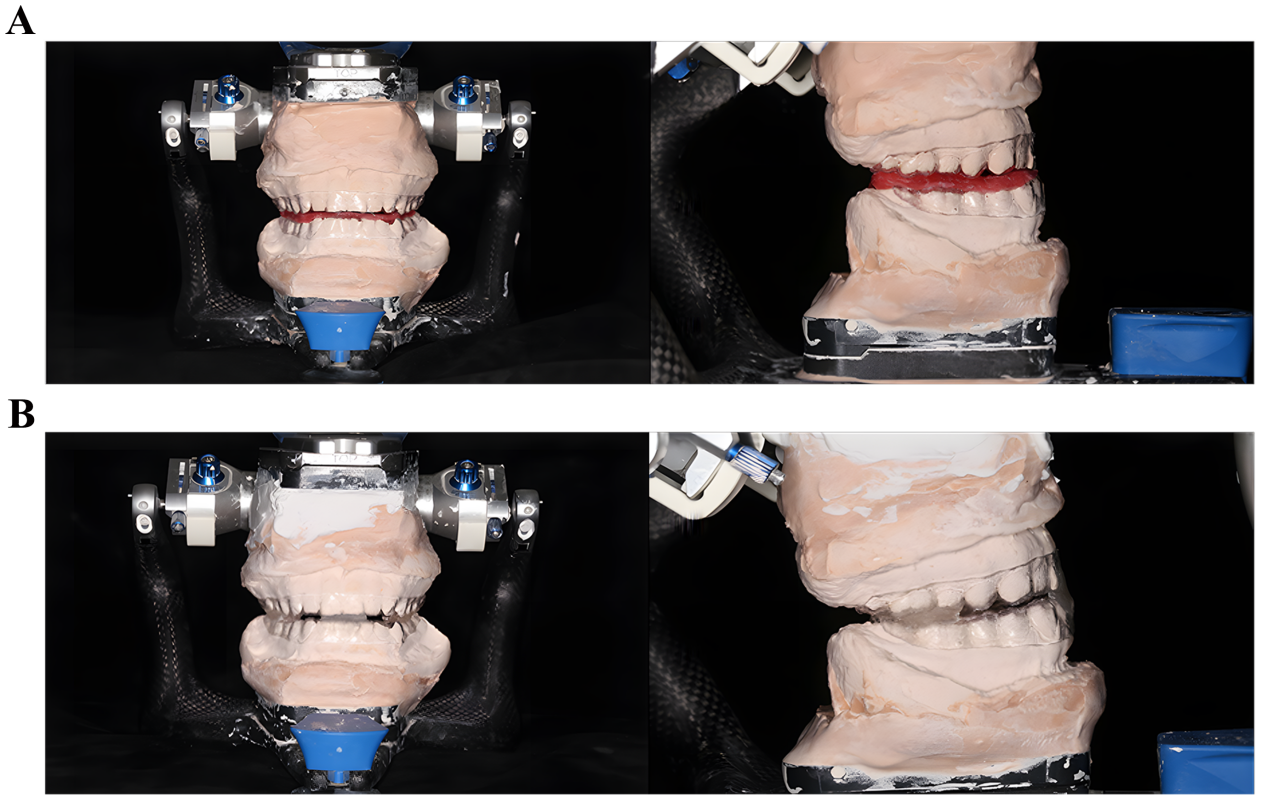


**Fig. S1 Fabrication process for the NARS.** A. Transferring the occlusal relationship to the articulator. B. A 0# self-curing resin bond was used to fix the maxillary and mandibular retainers. NARS, nighttime anterior repositioning splint


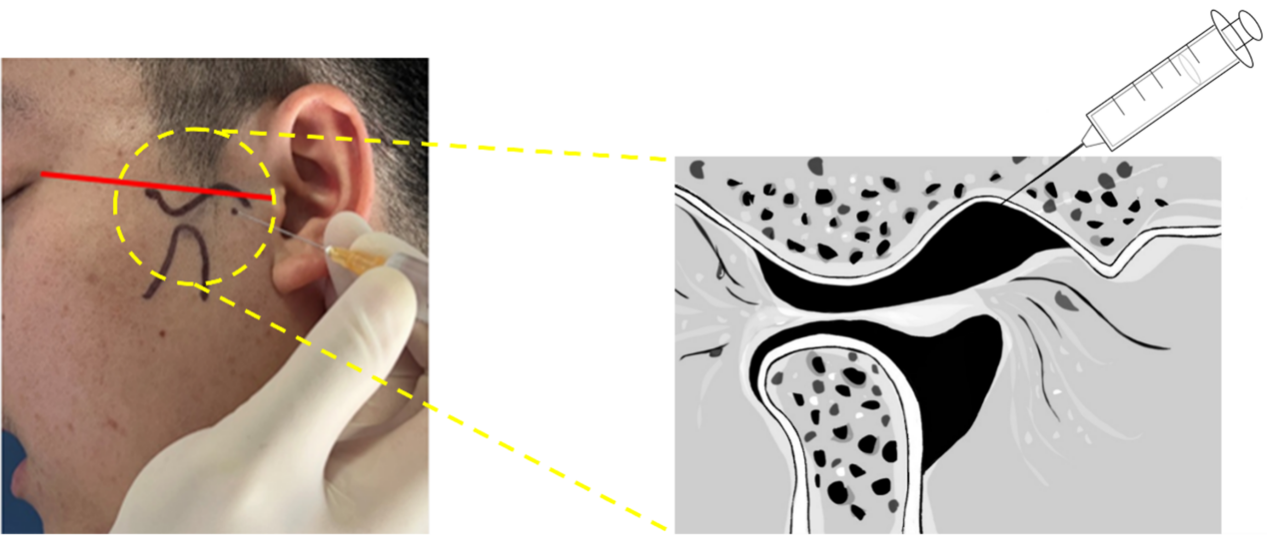


**Fig. S2 Schematic representation of arthrocentesis**


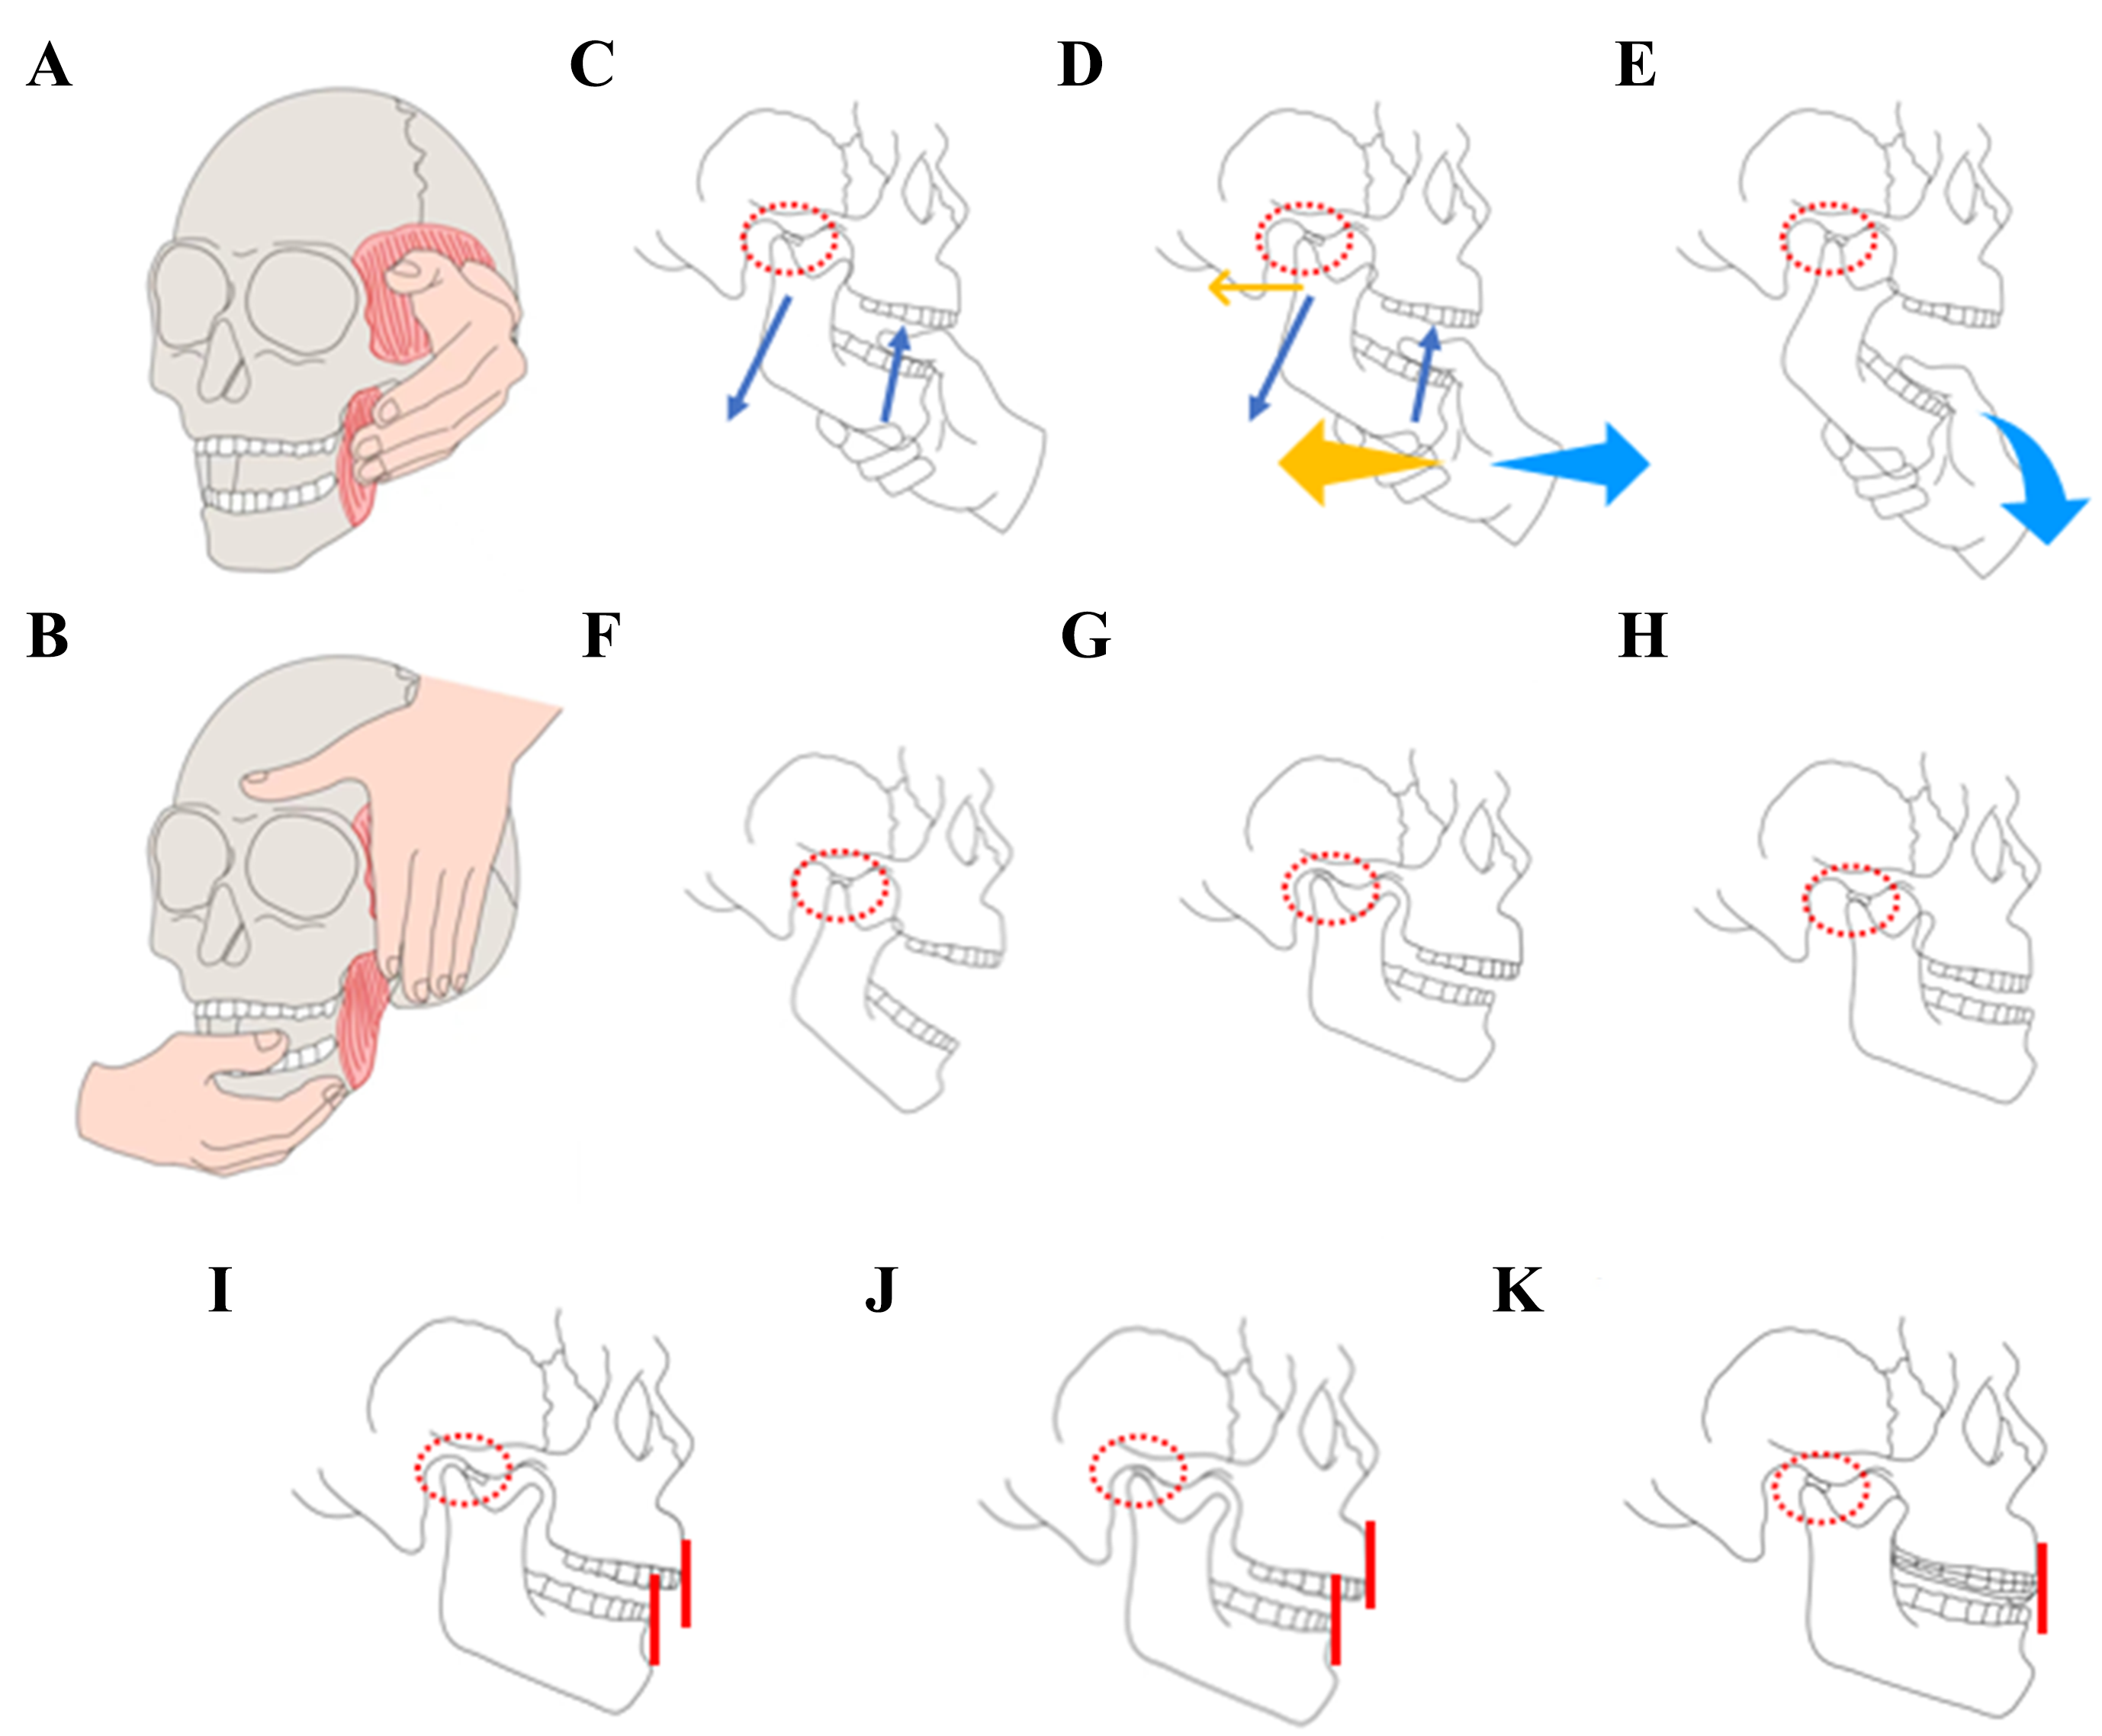


**Fig. S3 Schematic diagram showing manual reduction.** A-B. The muscles around the temporomandibular joint area were pressed and relaxed; C. Using the first molar as a fulcrum, force was applied to bring the mandible downwards; D. Then, the mandible was pulled forwards and to the opposite side; E. Next, the mandible was pulled downwards; F. The articular disc was reduced and located above the condyle with wide mouth opening; G. The disc-condyle relationship was normal in the closed mouth position; H. The disc-condyle relationship was normal when the incisors were in the opposite edge position; I. Position of the joint and disc before manual reduction; J. Position of the joint and disc after manual reduction; K. The disc-condylar relationship was maintained by the anterior repositioning splint

**Table S1 Comparison between the observation groups and control groups in terms of disc re-displacement within one week**

| Group | Re-displacement | Non re-displacement | Rate of re-displacement | χ2 | *P* |
| --- | --- | --- | --- | --- | --- |
| Observation groups (A + B) | 4 | 52 | 7.69% | 6.724 | 0.01 |
| Control groups (C + D) | 13 | 38 | 25.5% |

**Table S2 Comparison of treatment efficacy between the observation groups and control groups**

| Group | Effective | Ineffective | Rate of efficacy | χ2 | *P* |
| --- | --- | --- | --- | --- | --- |
| Observation groups (A + B) | 50 | 6 | 89.3% | 3.990 | 0.046 |
| Control groups (C + D) | 38 | 13 | 74.5% |
